# Supplementary material for: Isoindolinones as Michael Donors under Phase Transfer Catalysis: Enantioselective Synthesis of Phthalimidines Containing a Tetrasubstituted Carbon Stereocenter
Source: MDPI journal article supplement (doi:10.3390/molecules20058484), 2015-05-12
Supplement: s1 [file s1]

# Supplementary Materials

## 1. Copies of NMR Spectra of Most Relevant Key Intermediates and Final Adducts

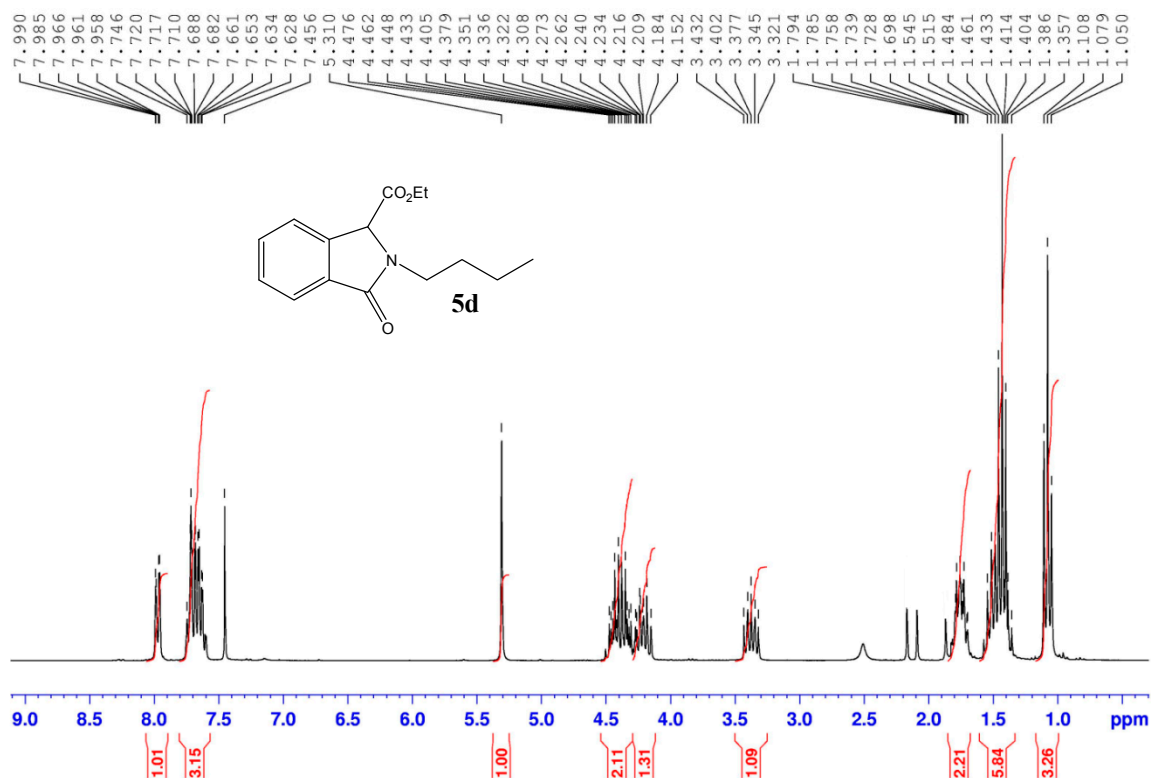

Figure S1. <sup>1</sup>H-NMR of compound 5d.

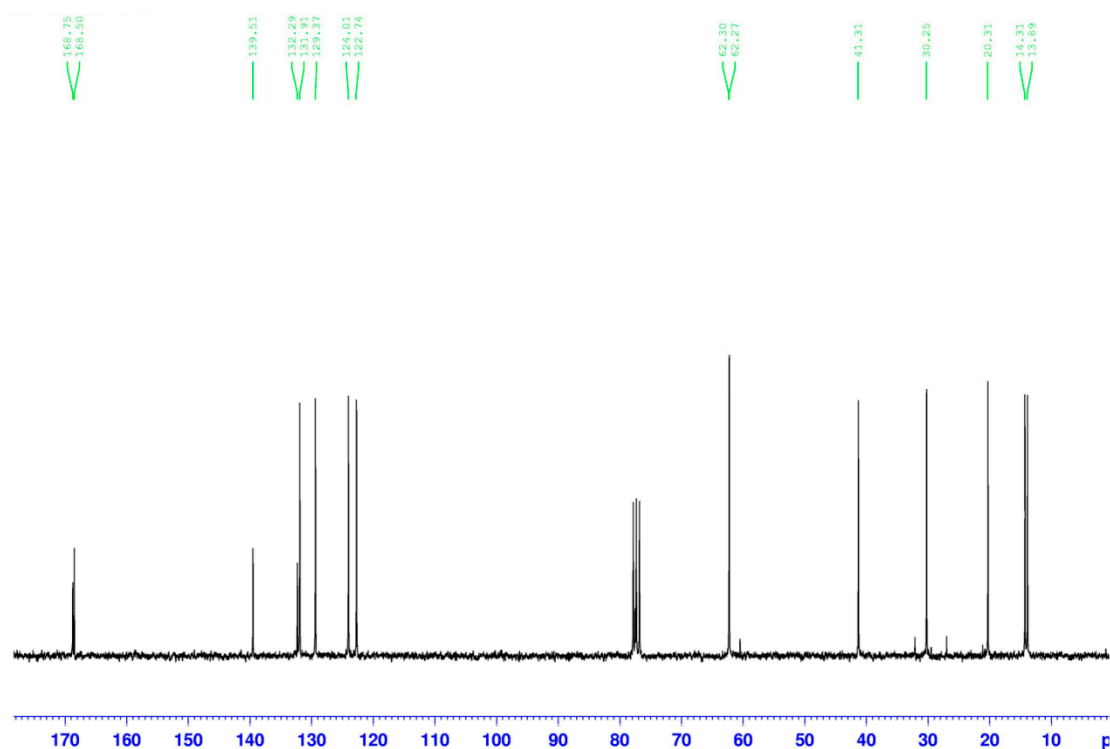

Figure S2. <sup>13</sup>C-NMR of compound 5d.

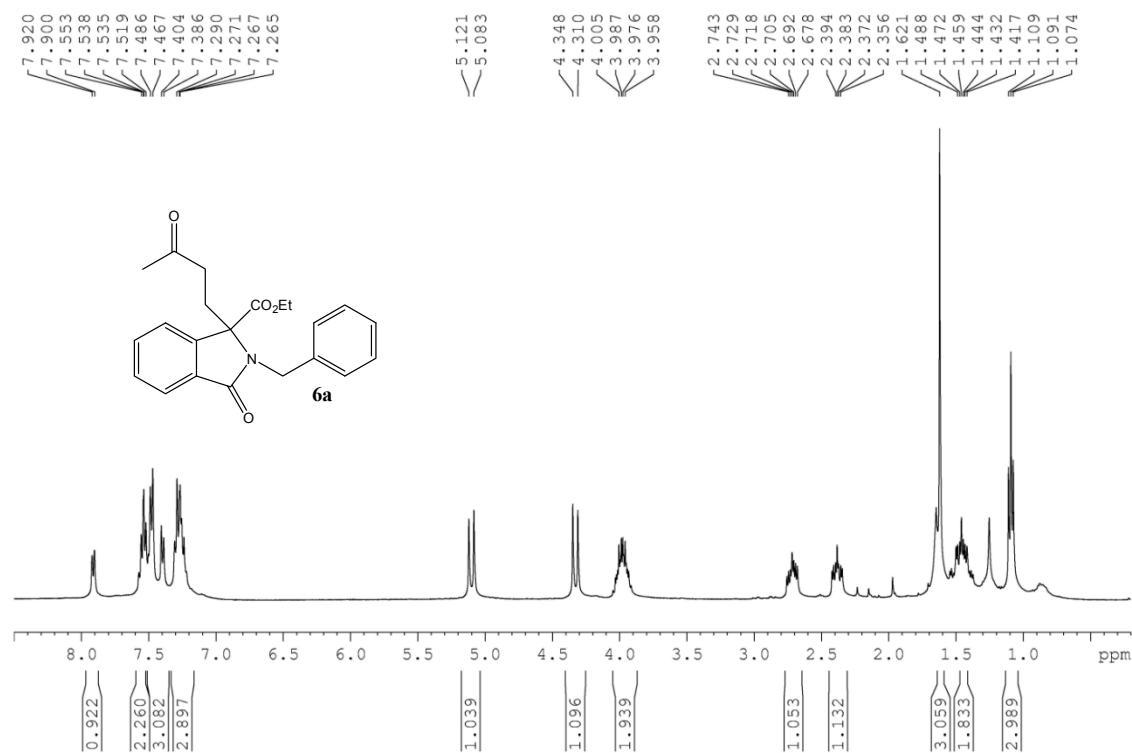Figure S3. <sup>1</sup>H-NMR of compound **6a**.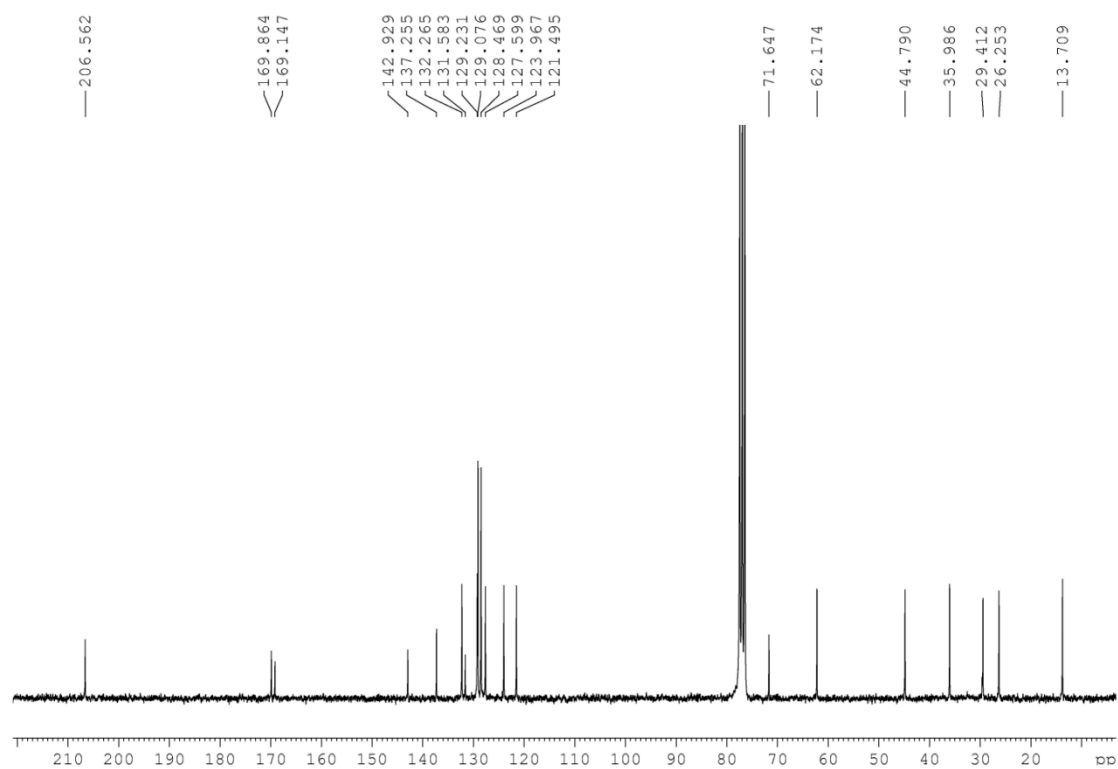Figure S4. <sup>13</sup>C-NMR of compound **6a**.

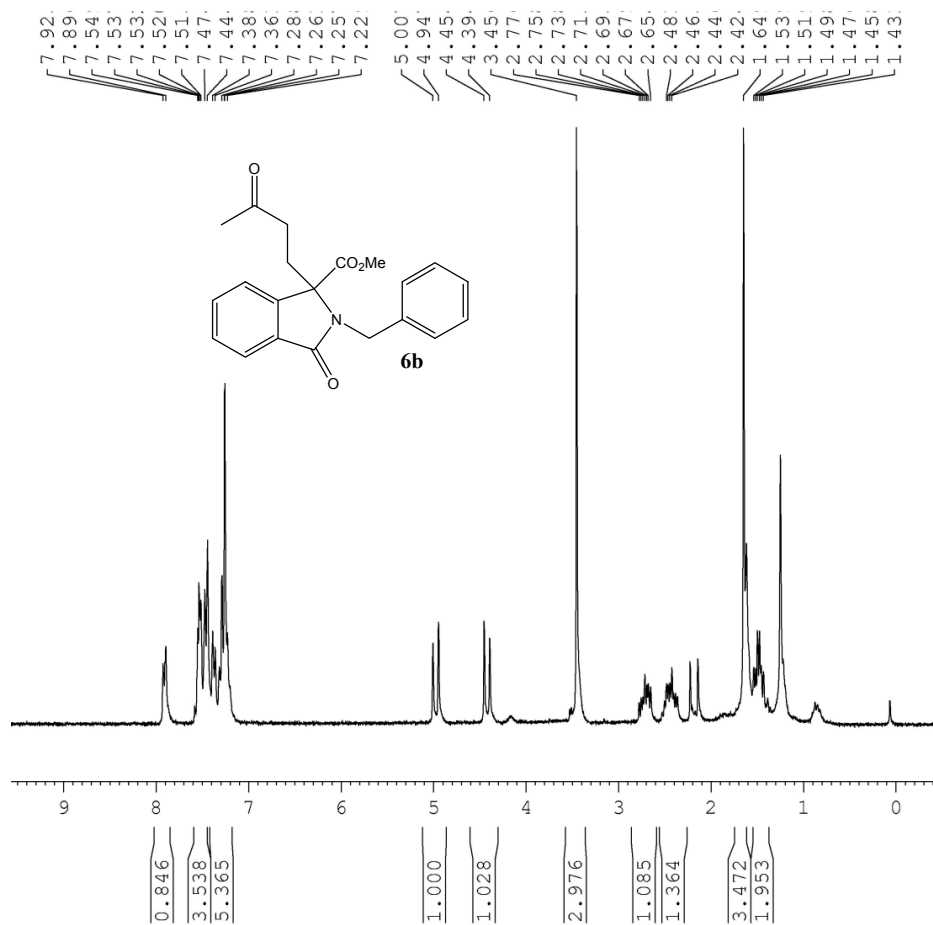

Figure S5.  $^1\text{H}$ -NMR of compound **6b**.

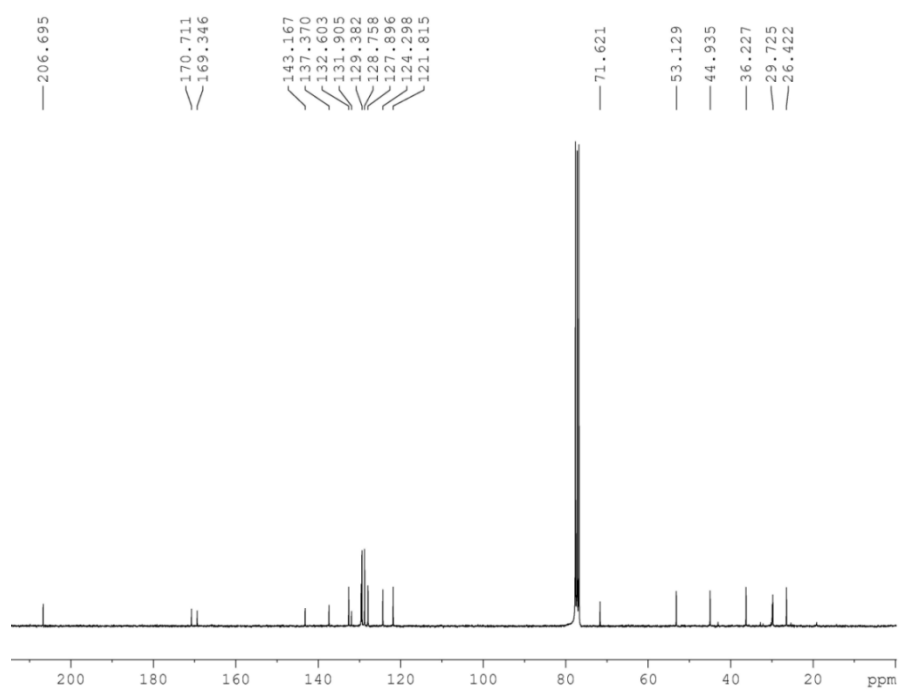

Figure S6.  $^{13}\text{C}$ -NMR of compound **6b**.

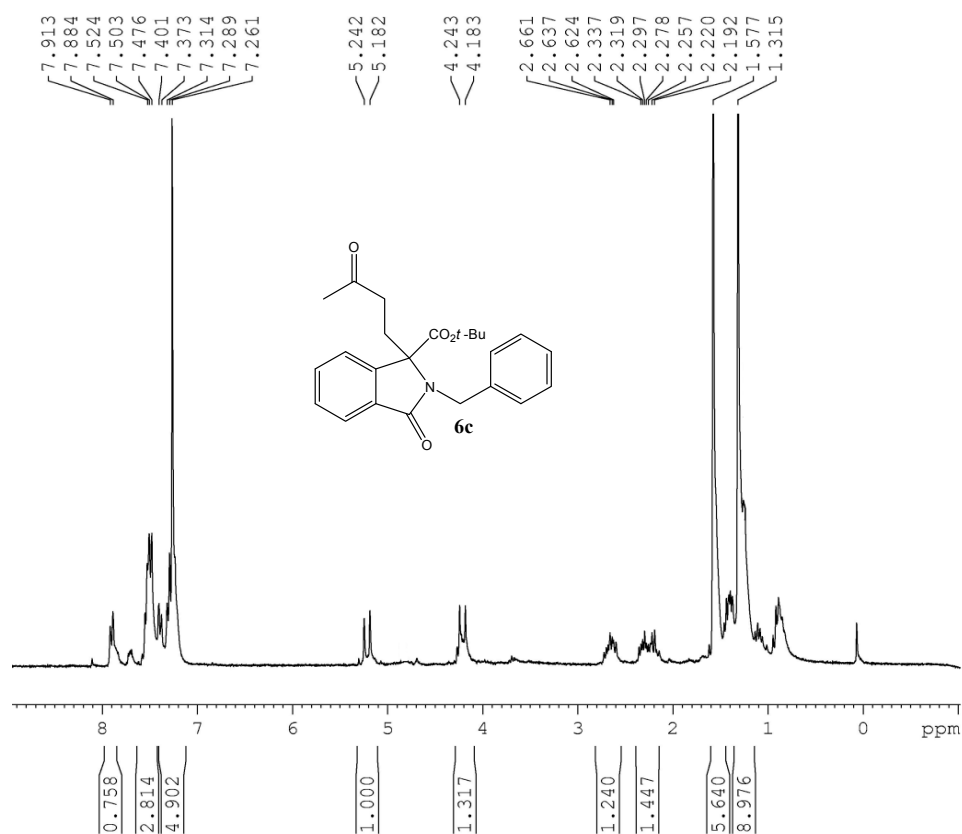

**Figure S7.**  $^1\text{H}$ -NMR of compound **6c**.

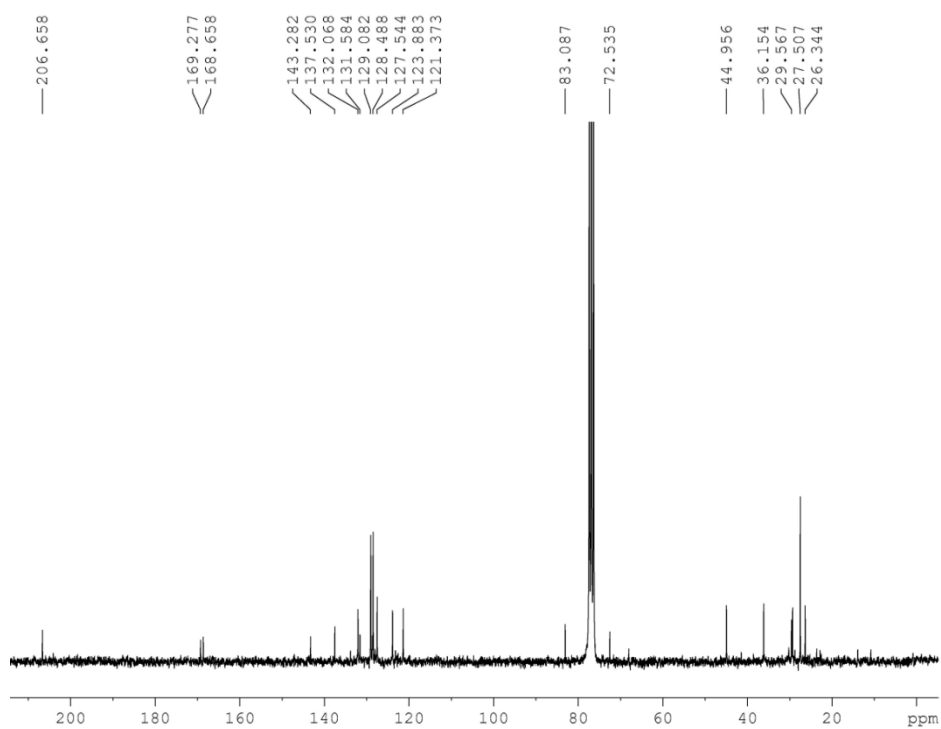

**Figure S8.**  $^{13}\text{C}$ -NMR of compound **6c**.

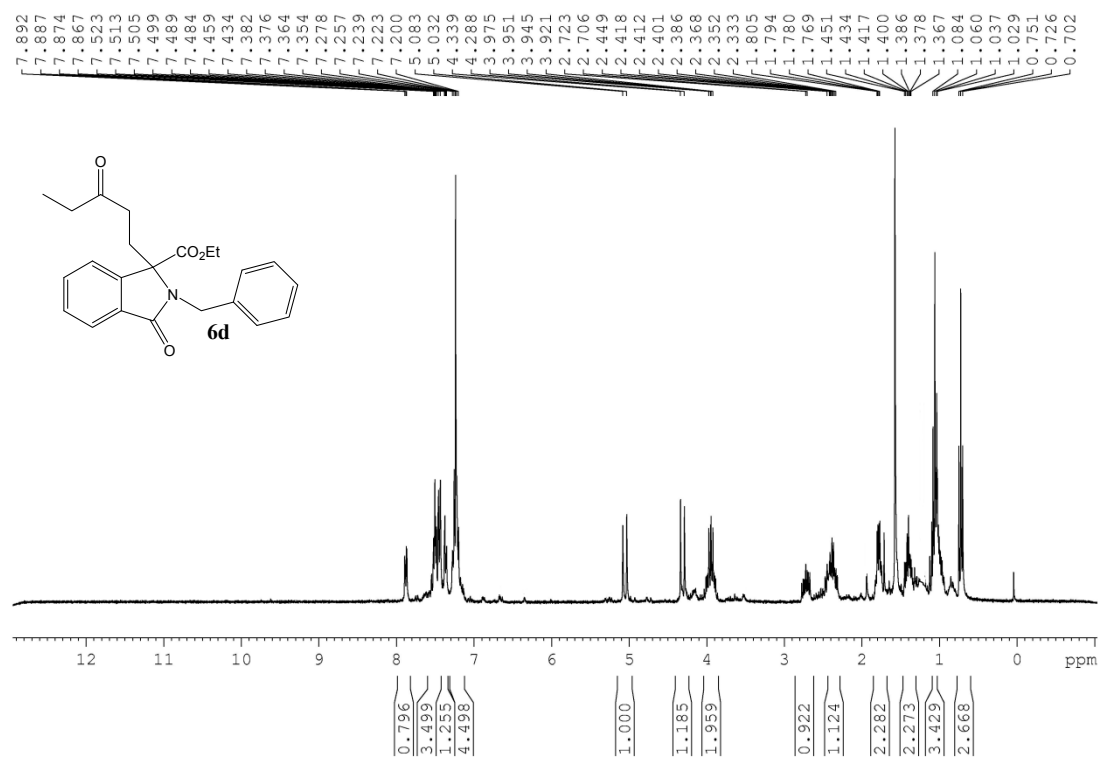Figure S9. <sup>1</sup>H-NMR of compound **6d**.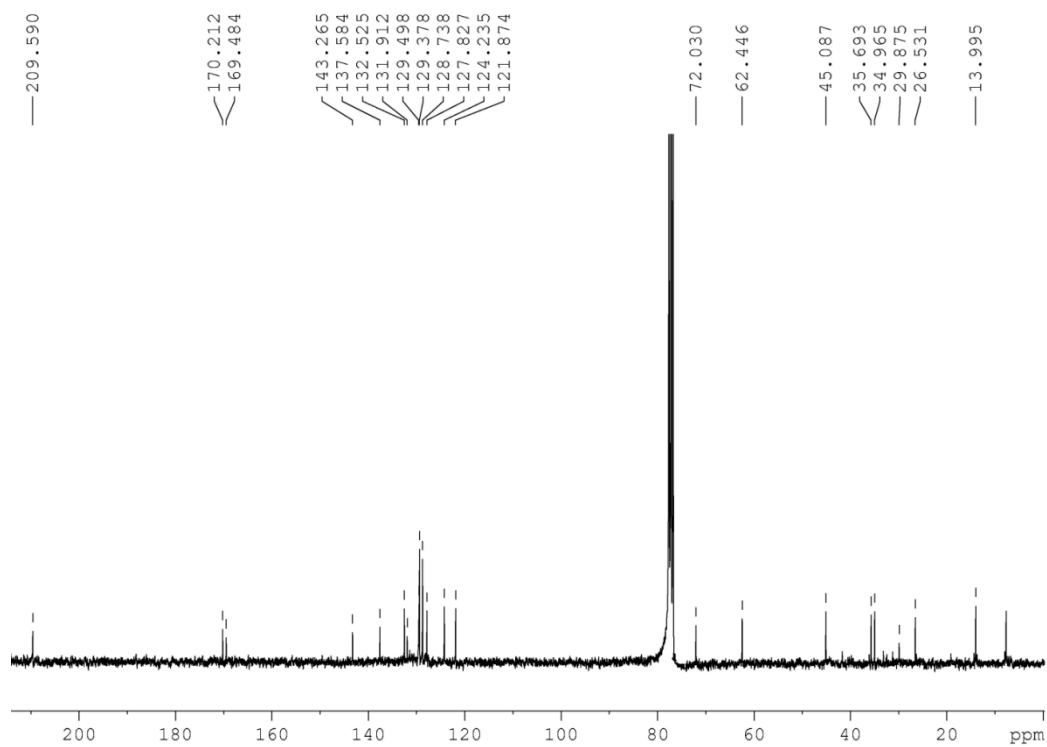Figure S10. <sup>13</sup>C-NMR of compound **6d**.

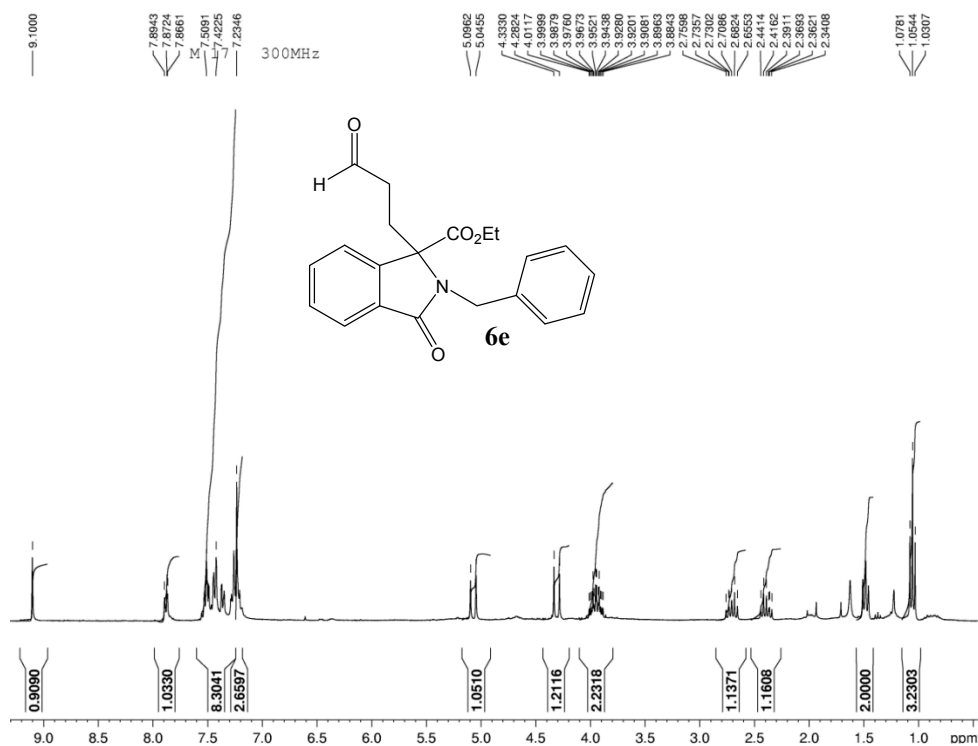

**Figure S11.** <sup>1</sup>H-NMR of compound **6e**.

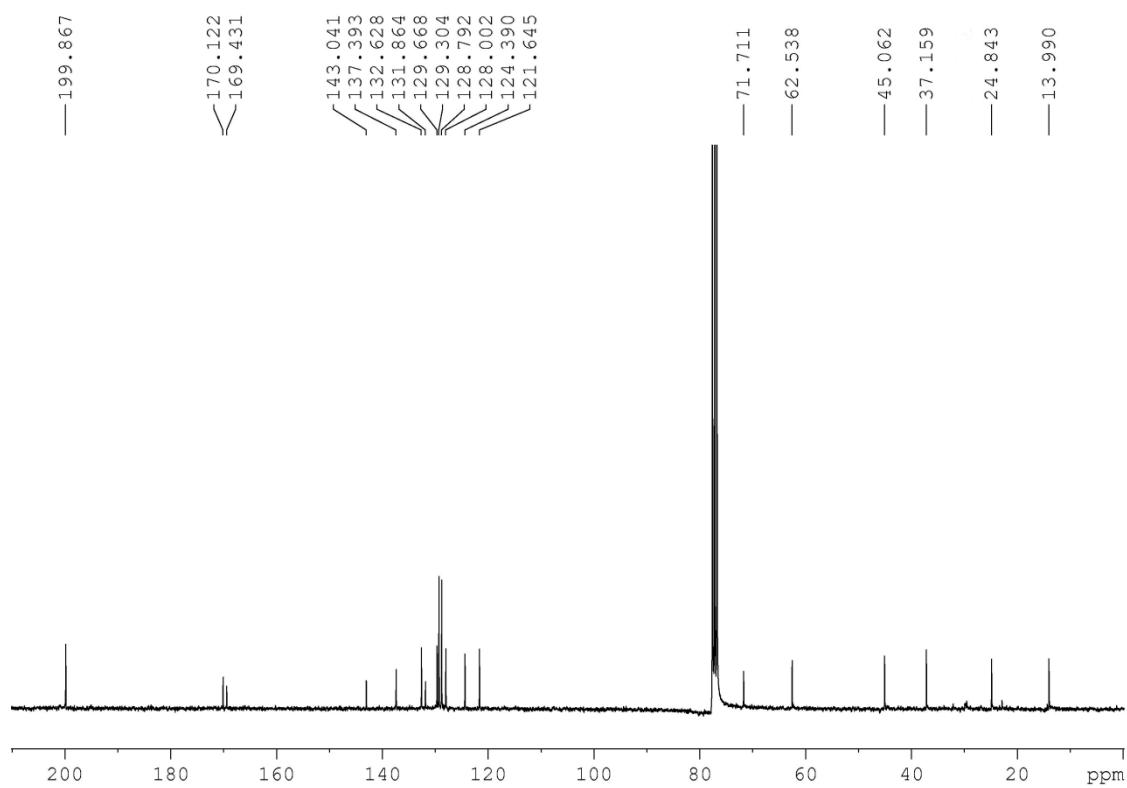

**Figure S12.** <sup>13</sup>C-NMR of compound **6e**.

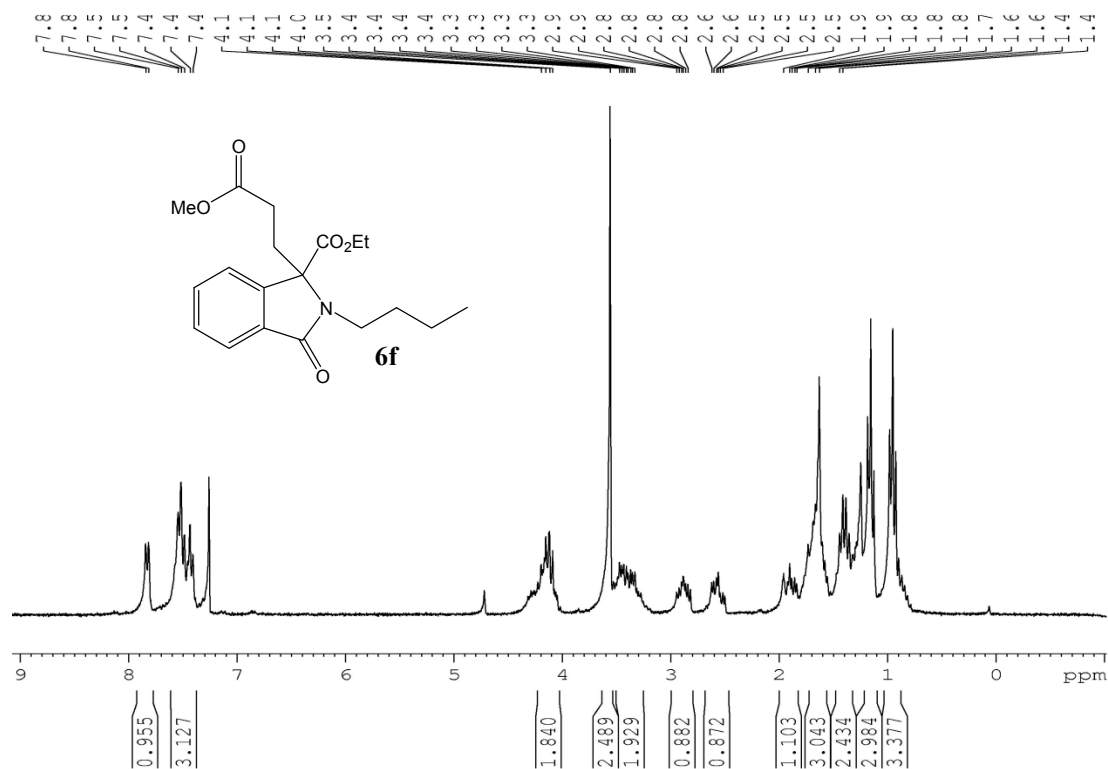Figure S13.  $^1\text{H}$ -NMR of compound **6f**.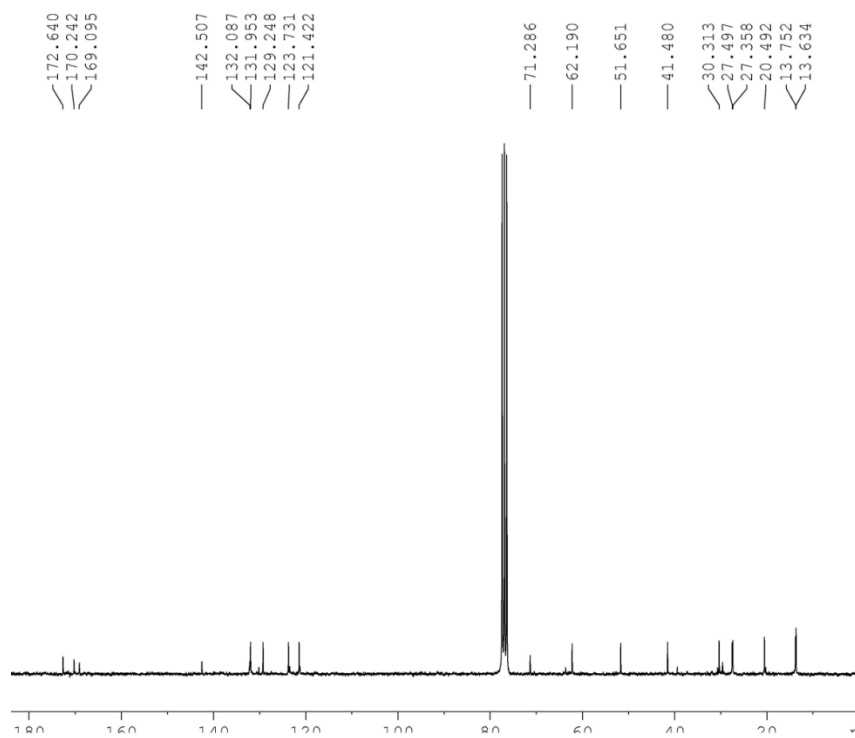Figure S14.  $^{13}\text{C}$ -NMR of compound **6f**.

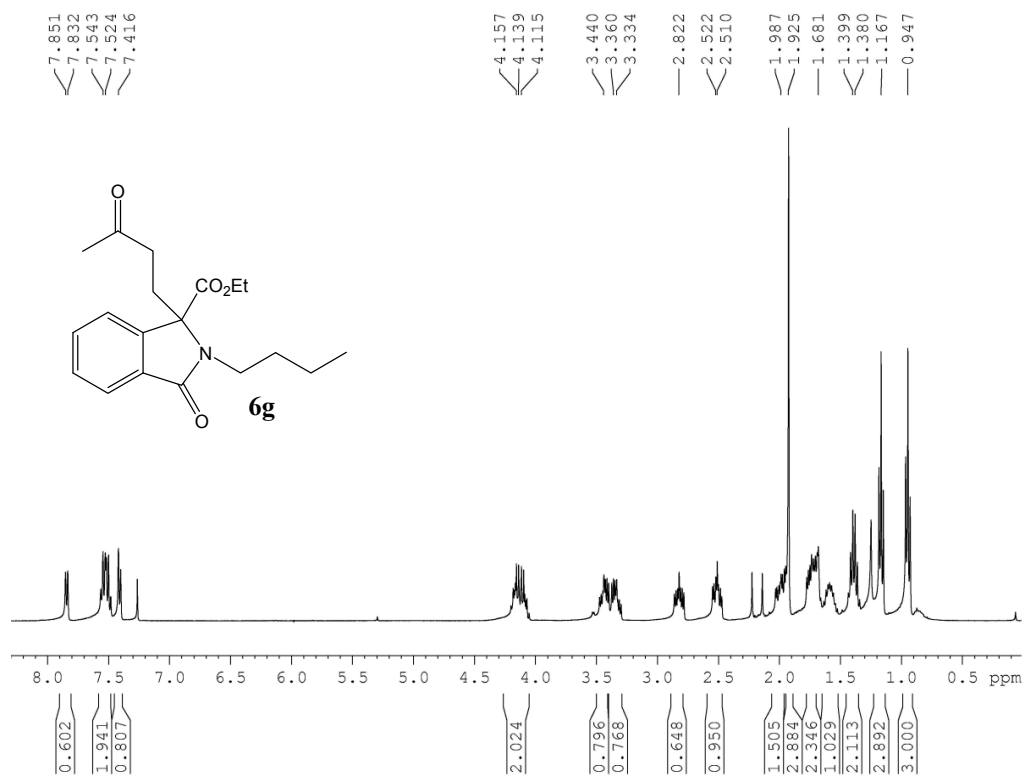Figure S15. <sup>1</sup>H-NMR of compound **6g**.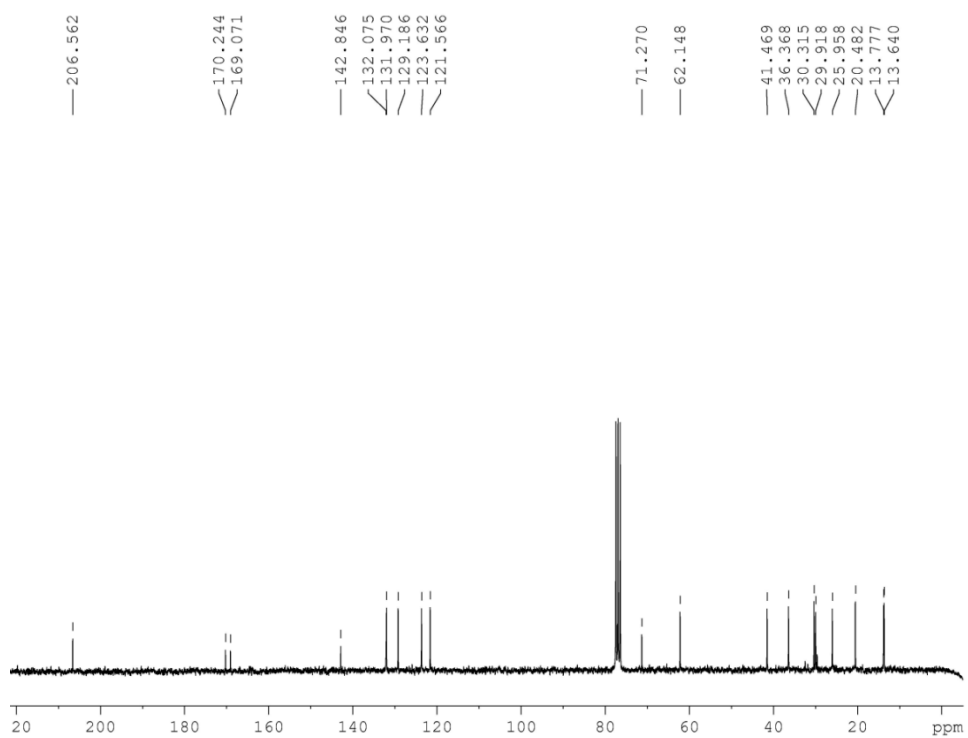Figure S16. <sup>13</sup>C-NMR of compound **6g**.



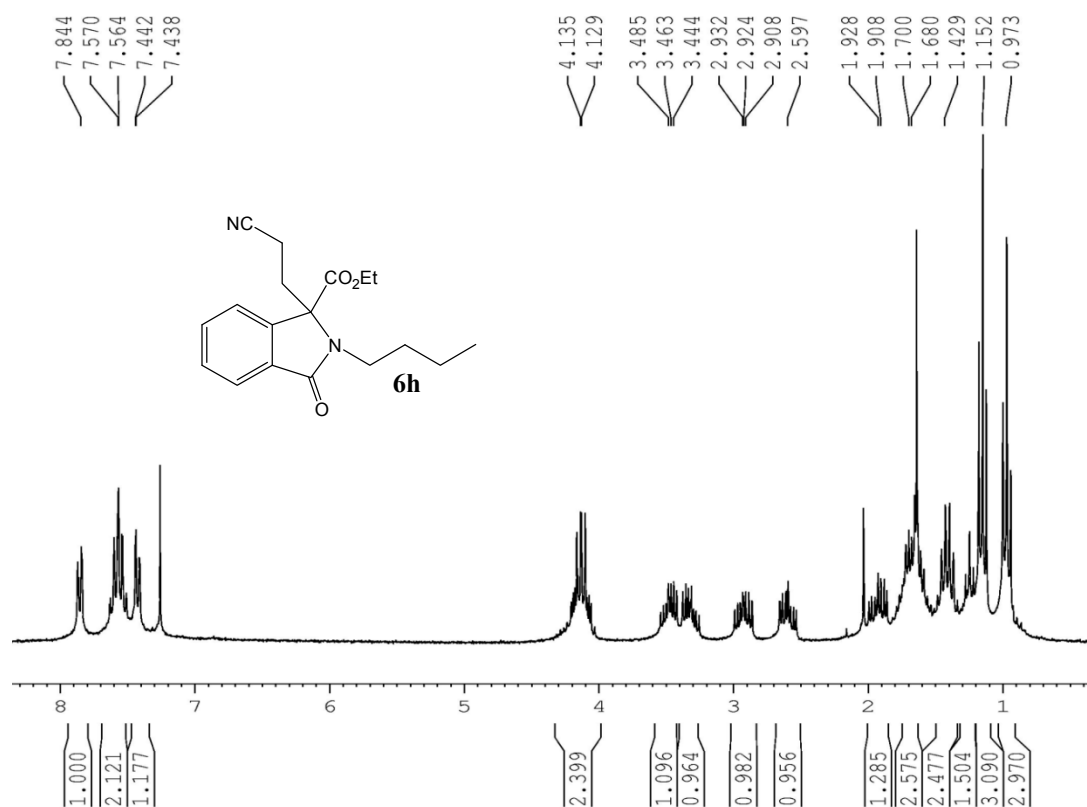

**Figure S17.** <sup>1</sup>H-NMR of compound **6h**.

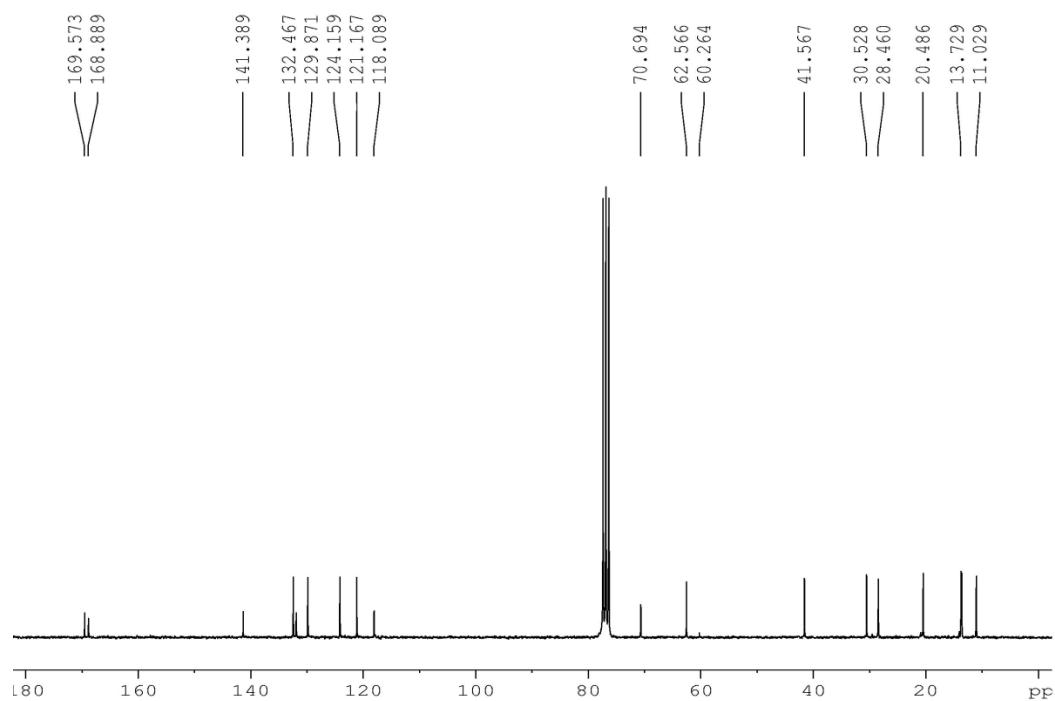

**Figure S18.** <sup>13</sup>C-NMR of compound **6h**.

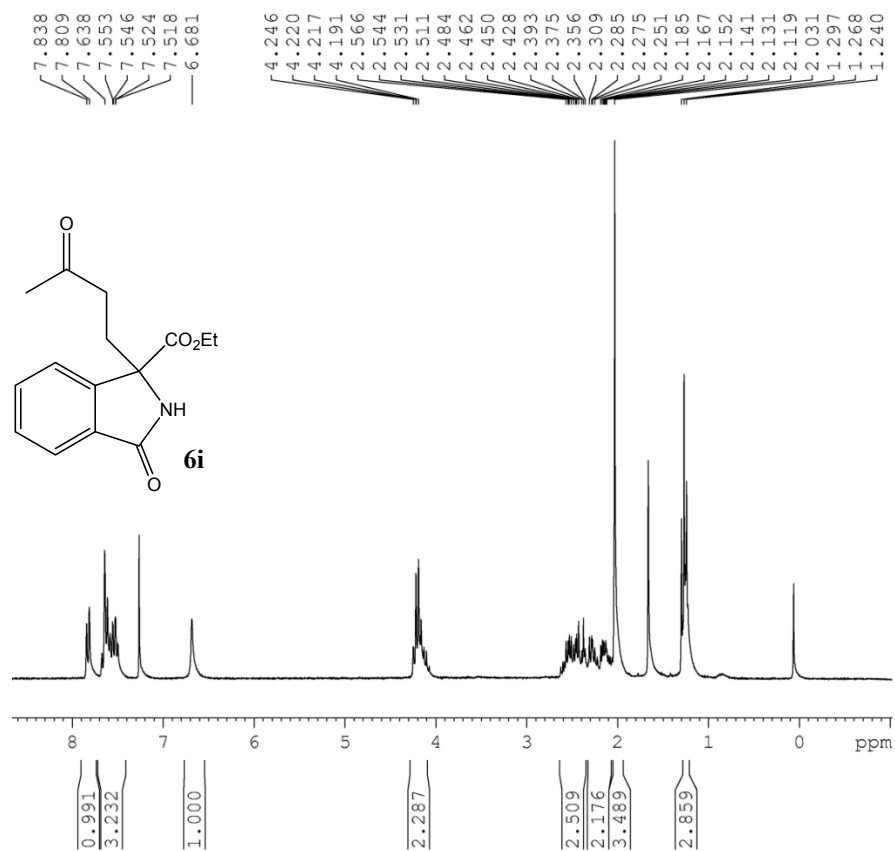Figure S19. <sup>1</sup>H-NMR of compound 6i.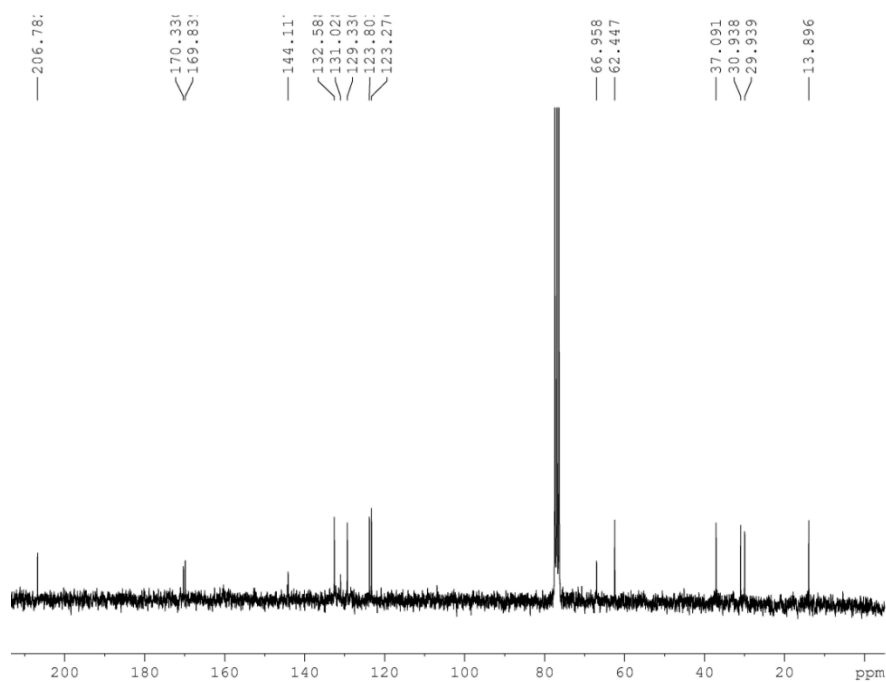Figure S20. <sup>13</sup>C-NMR of compound 6i.

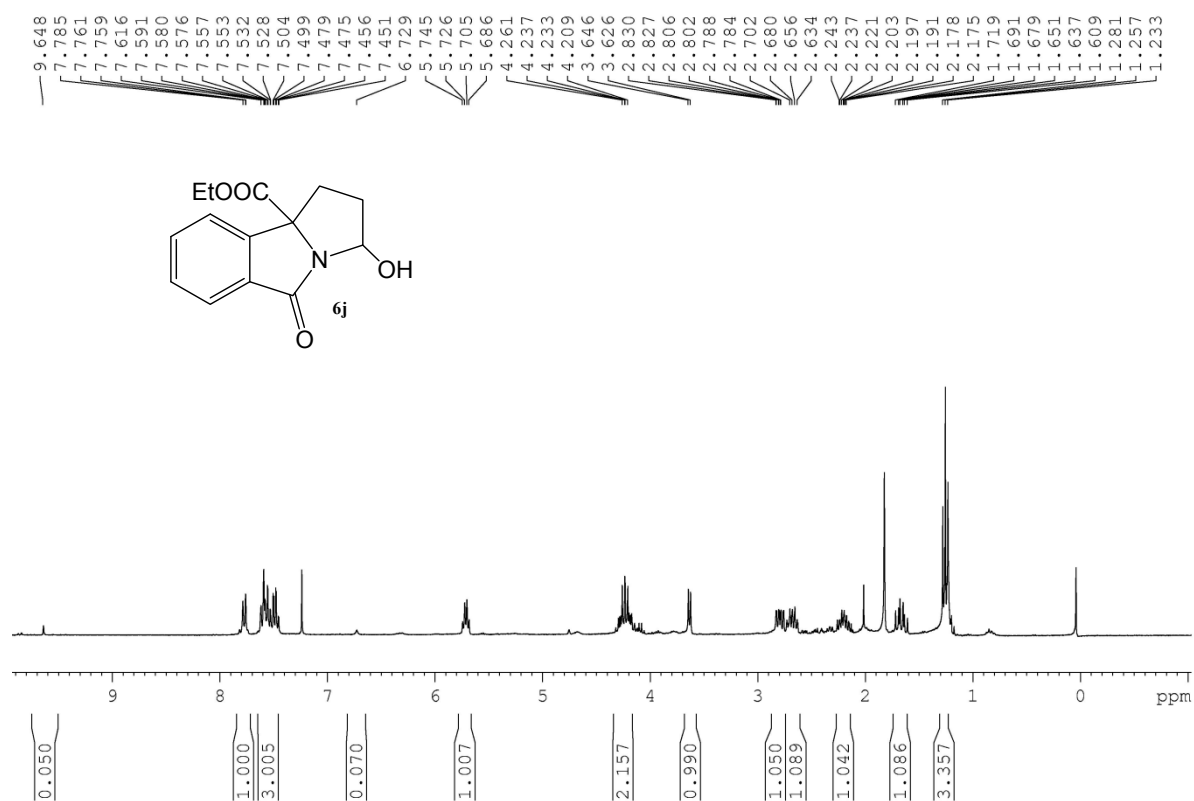Figure S21. <sup>1</sup>H-NMR of compound **6j**.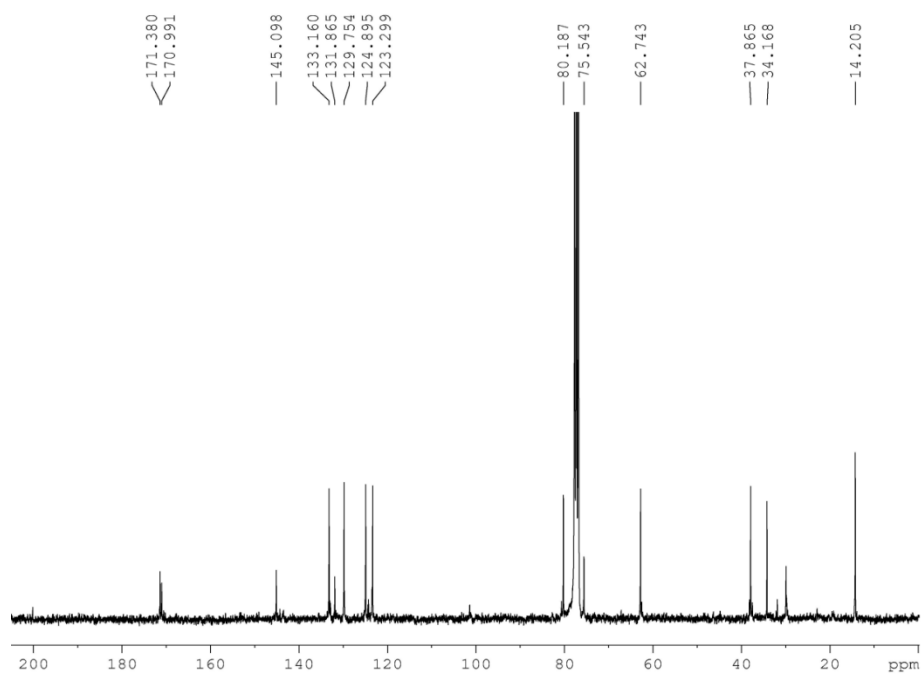Figure S22. <sup>13</sup>C-NMR of compound **6j**.

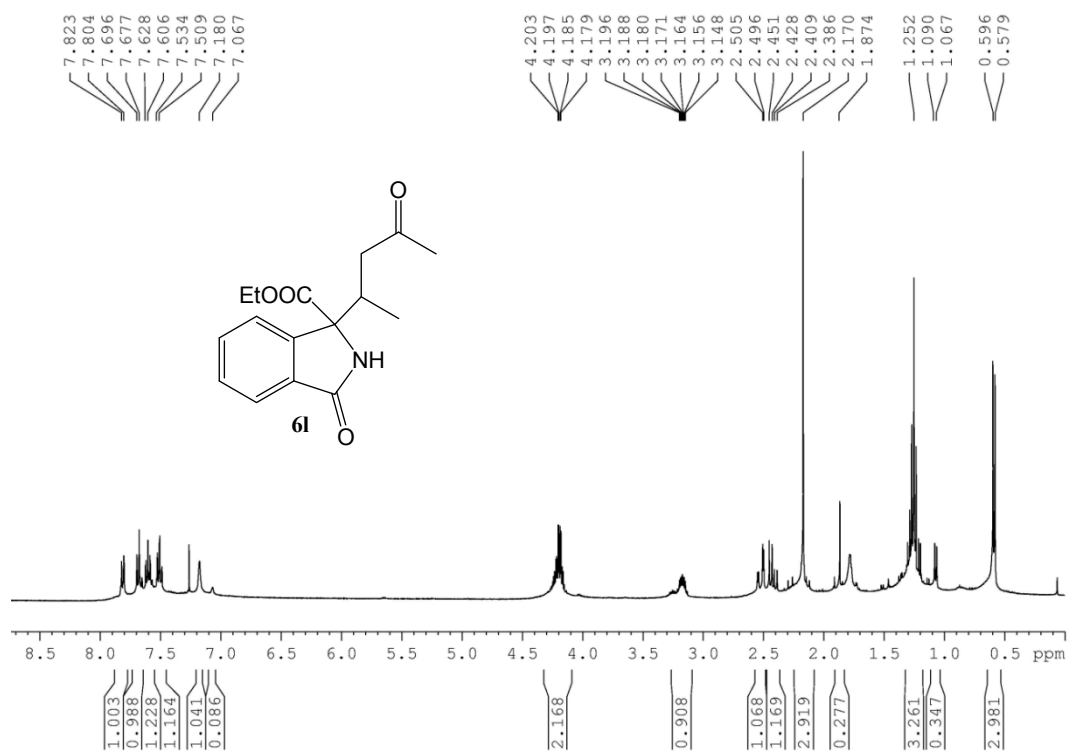

**Figure S23.** <sup>1</sup>H-NMR of compound **6l**.

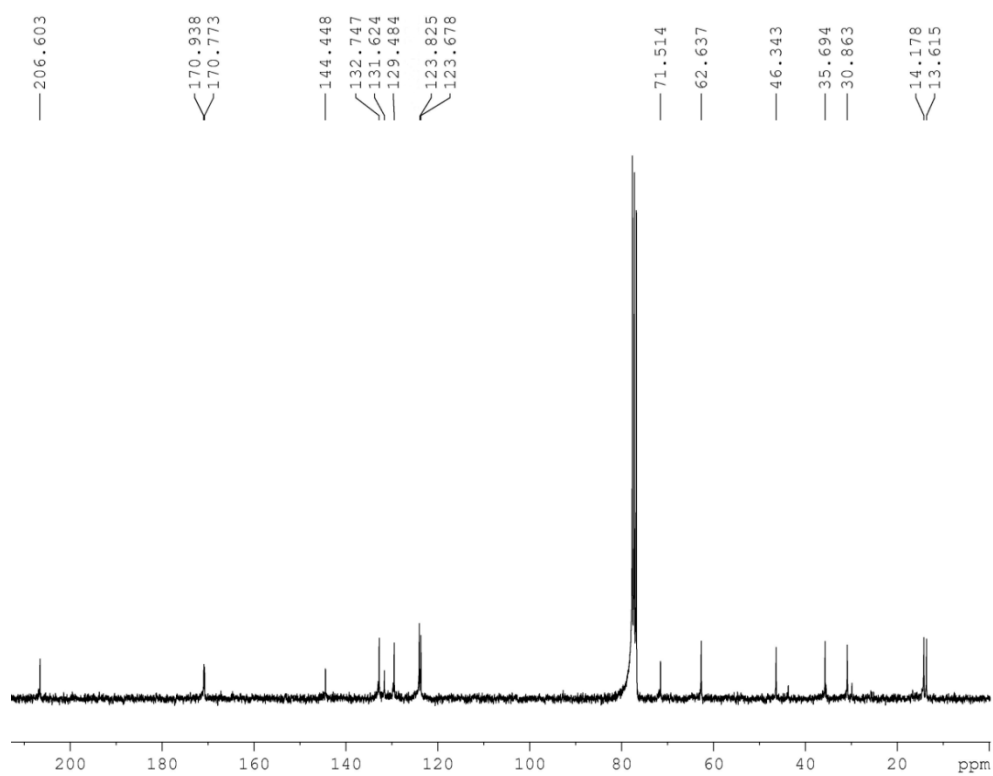

**Figure S24.** <sup>13</sup>C-NMR of compound **6l**.

## 2. Selected HPLC-Chromatograms(Chiral Stationary Phase)

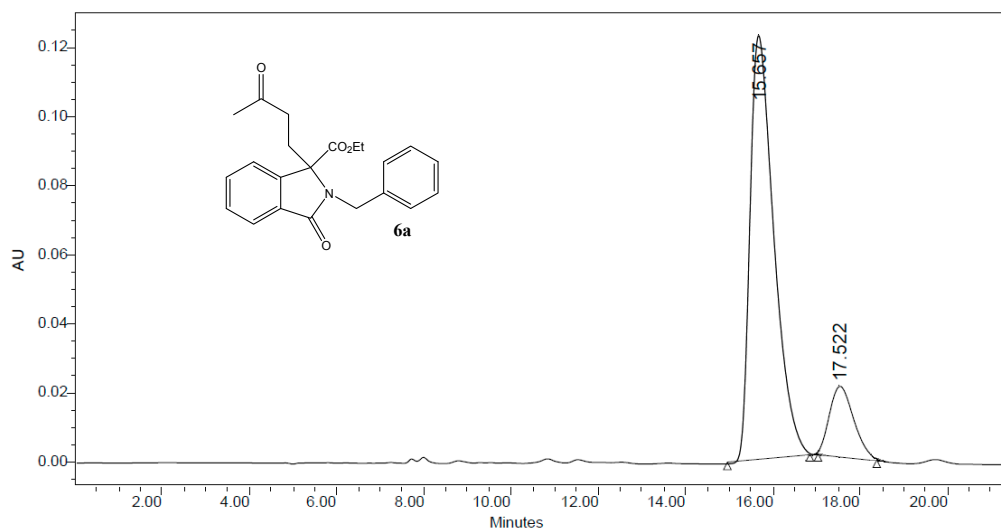

|   | RT<br>(min) | Area<br>(V*sec) | % Area | Height<br>(V) | %<br>Height |
|---|-------------|-----------------|--------|---------------|-------------|
| 1 | 15.657      | 4679656         | 86.62  | 122939        | 86.29       |
| 2 | 17.522      | 722552          | 13.38  | 19535         | 13.71       |

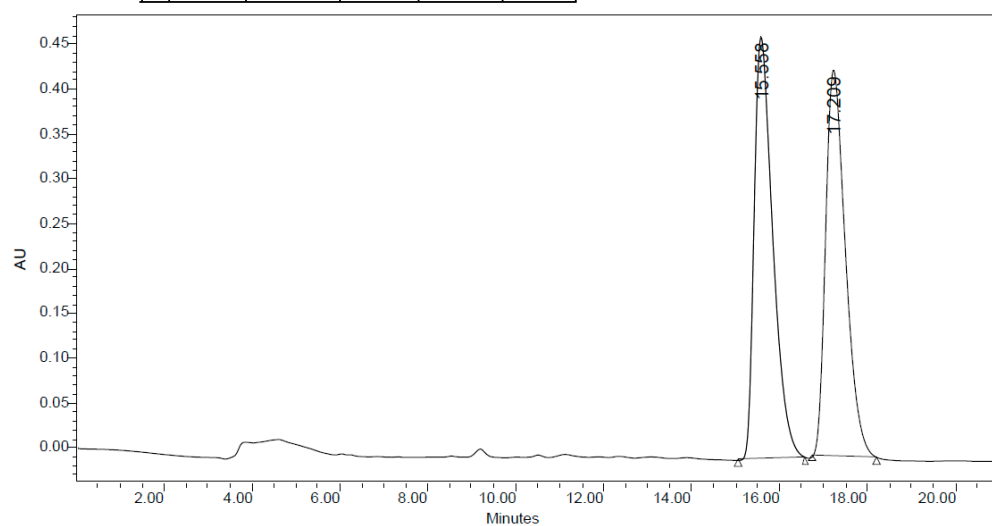

|   | RT<br>(min) | Area<br>(V*sec) | % Area | Height<br>(V) | %<br>Height |
|---|-------------|-----------------|--------|---------------|-------------|
| 1 | 15.558      | 13900619        | 50.73  | 471059        | 52.25       |
| 2 | 17.209      | 13498637        | 49.27  | 430555        | 47.75       |

**Figure S25.** HPLC traces of enantioenriched and racemic compound **6a**.

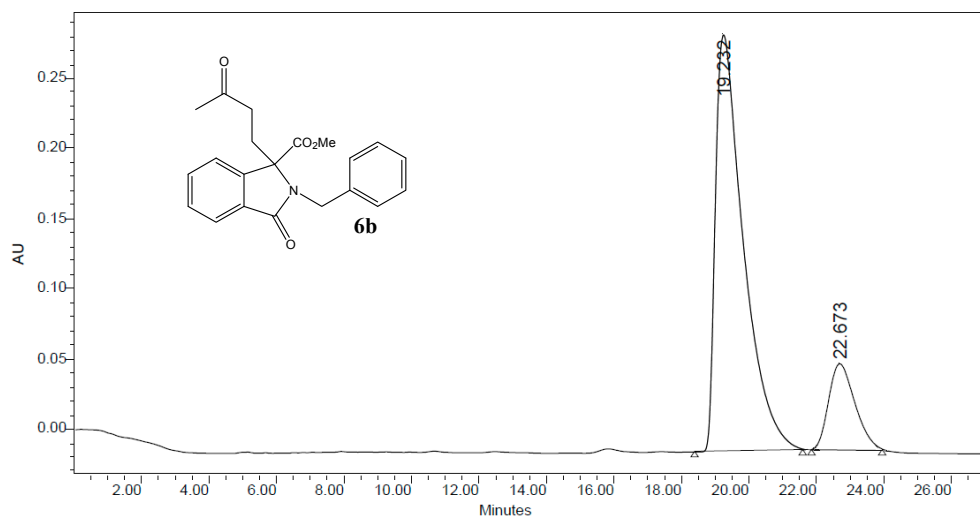

|   | RT<br>(min) | Area<br>(V*sec) | % Area | Height<br>(V) | %<br>Height |
|---|-------------|-----------------|--------|---------------|-------------|
| 1 | 19.232      | 17109418        | 84.88  | 297081        | 83.41       |
| 2 | 22.673      | 3047868         | 15.12  | 59079         | 16.59       |

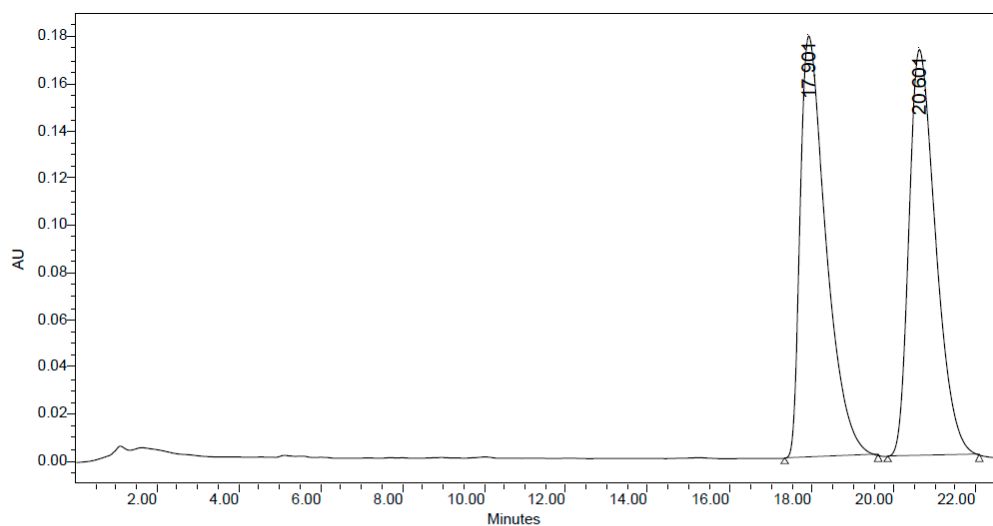

|   | RT<br>(min) | Area<br>(V*sec) | % Area | Height<br>(V) | %<br>Height |
|---|-------------|-----------------|--------|---------------|-------------|
| 1 | 17.901      | 7851411         | 50.07  | 178739        | 50.92       |
| 2 | 20.601      | 7828373         | 49.93  | 172305        | 49.08       |

**Figure S26.** HPLC traces of enantioenriched and racemic compound **6b**.

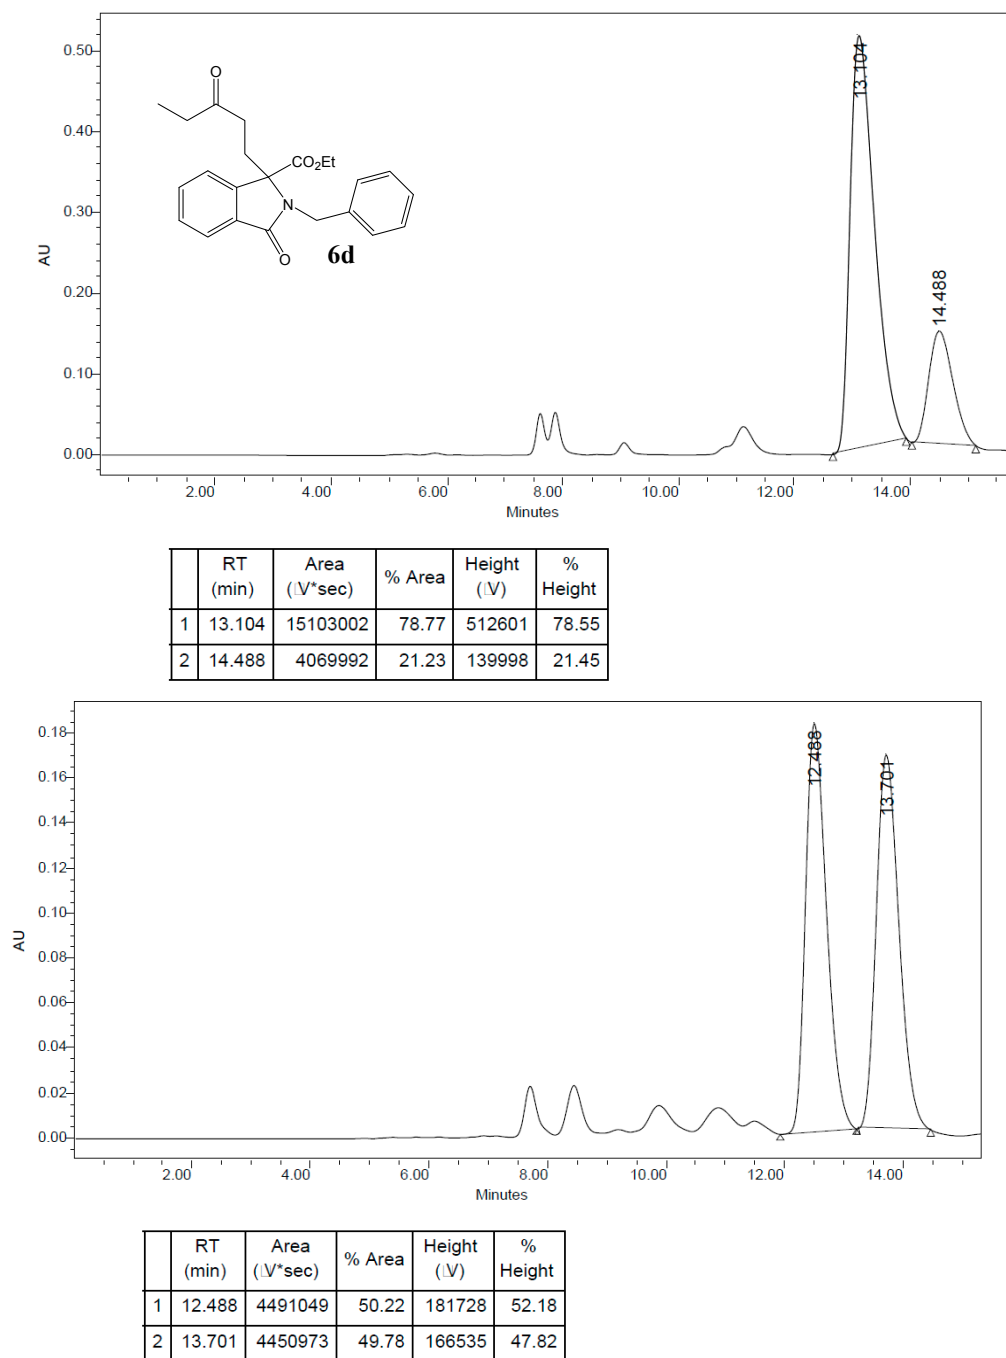

**Figure S27.** HPLC traces of enantioenriched and racemic compound **6d**.

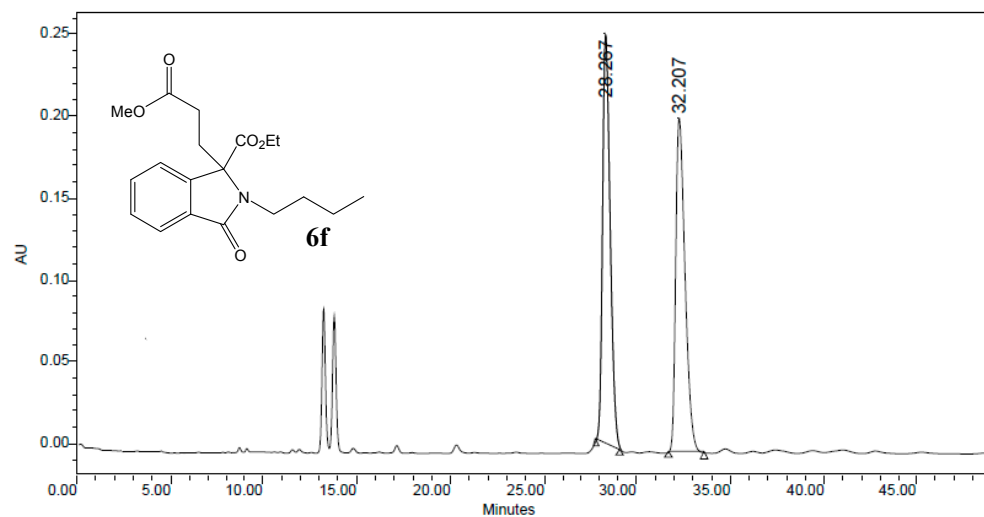

|   | RT<br>(min) | Area<br>( $\Delta V \cdot \text{sec}$ ) | % Area | Height<br>( $\Delta V$ ) | % Height |
|---|-------------|-----------------------------------------|--------|--------------------------|----------|
| 1 | 28.267      | 7041053                                 | 49.92  | 249223                   | 55.02    |
| 2 | 32.207      | 7064857                                 | 50.08  | 203764                   | 44.98    |

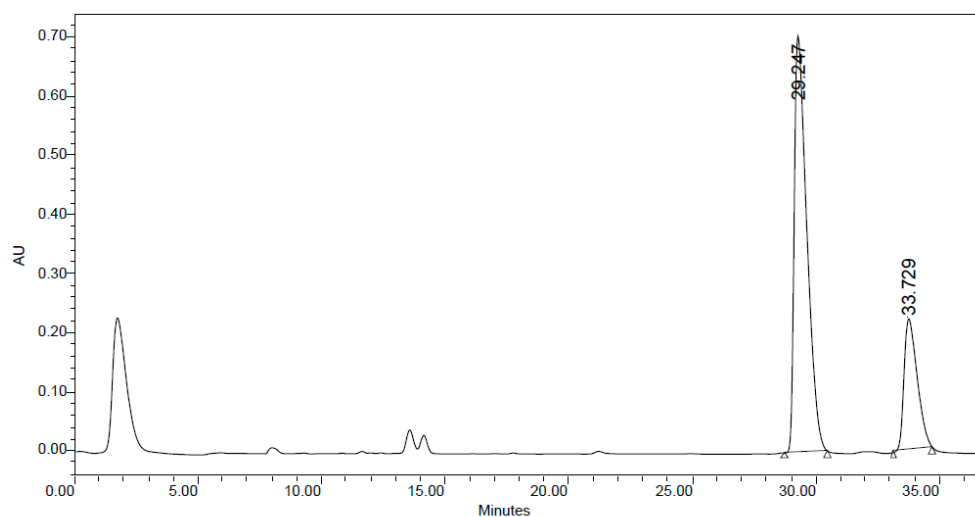

|   | RT<br>(min) | Area<br>( $\Delta V \cdot \text{sec}$ ) | % Area | Height<br>( $\Delta V$ ) | % Height |
|---|-------------|-----------------------------------------|--------|--------------------------|----------|
| 1 | 29.247      | 25027896                                | 75.04  | 704285                   | 75.96    |
| 2 | 33.729      | 8323442                                 | 24.96  | 222852                   | 24.04    |

**Figure S28.** HPLC traces of enantioenriched and racemic compound **6f**.



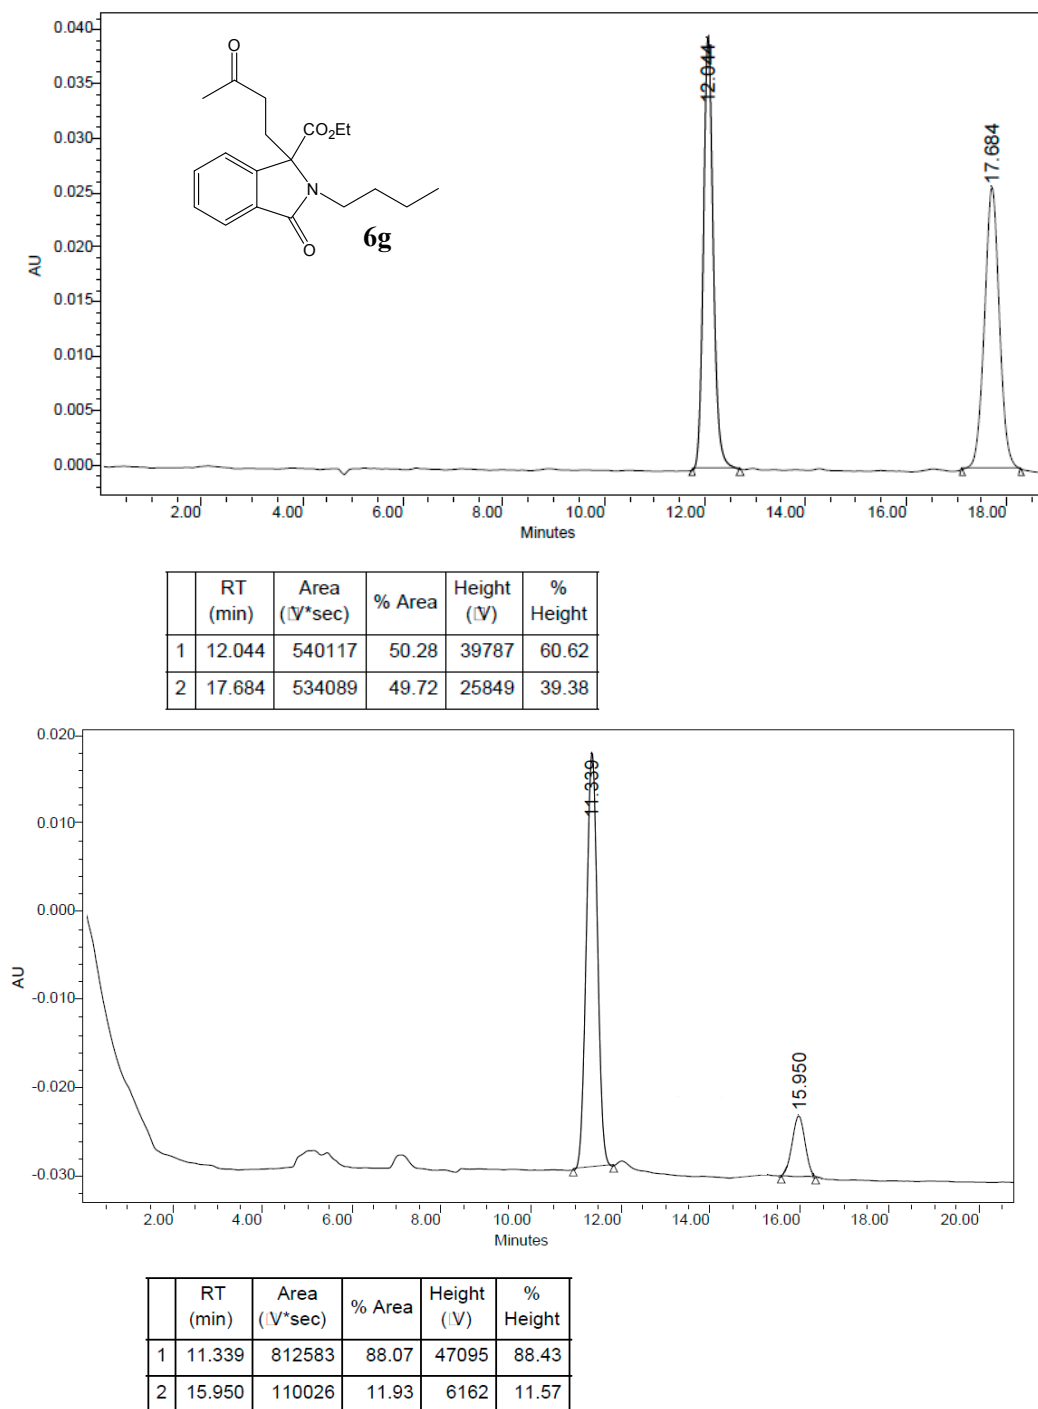

**Figure S29.** HPLC traces of enantioenriched and racemic compound **6g**.
